# Supplementary material for: Structural insights into a high fidelity variant of SpCas9
Source: PubMed Central journal article supplement (PMC6460432; doi:10.1038/s41422-018-0131-6), 2019-01-21
Supplement: 41422_2018_131_MOESM1_ESM.pdf [file 41422_2018_131_MOESM1_ESM.pdf]

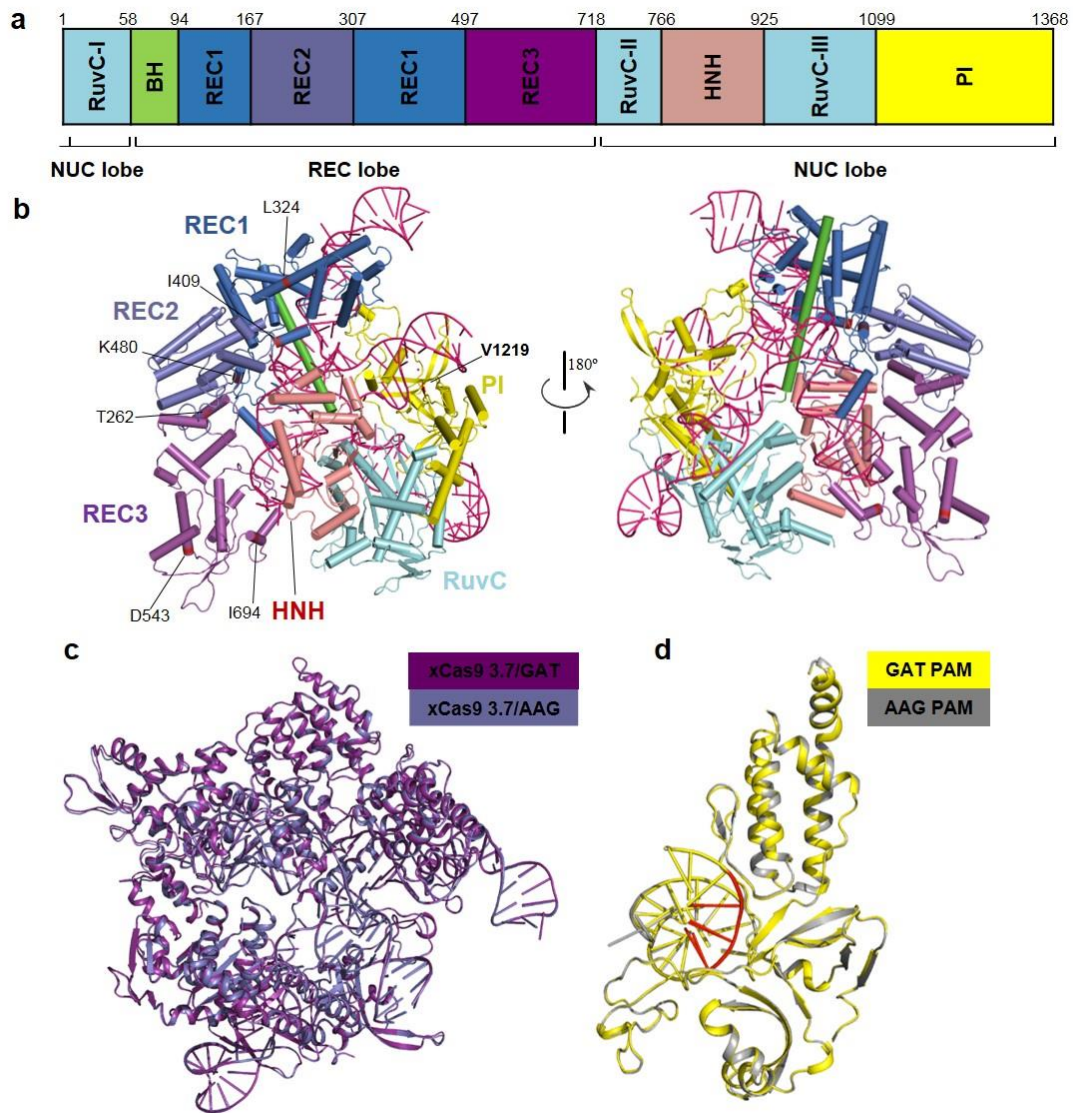

**Fig. S1 Structural comparison of xCas9 3.7/GAT and xCas9 3.7/AAG**

- a.** Domain organization of xCas9 3.7. BH, bridge helix; PI, PAM-interacting domain. Color coding is as in Fig. 1a.
- b.** Cartoon representation of the xCas9 3.7/sgRNA/DNA complex.
- c.** Superimposition of the overall structures of xCas9 3.7/GAT (purple) and xCas9 3.7/AAG (slate).
- d.** Structural comparison of PI domains of xCas9 3.7/GAT (yellow) and xCas9 3.7/AAG (gray)
