# Supplementary material for: Structural insights into a high fidelity variant of SpCas9
Source: PubMed Central journal article supplement (PMC6460432; doi:10.1038/s41422-018-0131-6), 2019-01-21
Supplement: 41422_2018_131_MOESM2_ESM.pdf [file 41422_2018_131_MOESM2_ESM.pdf]

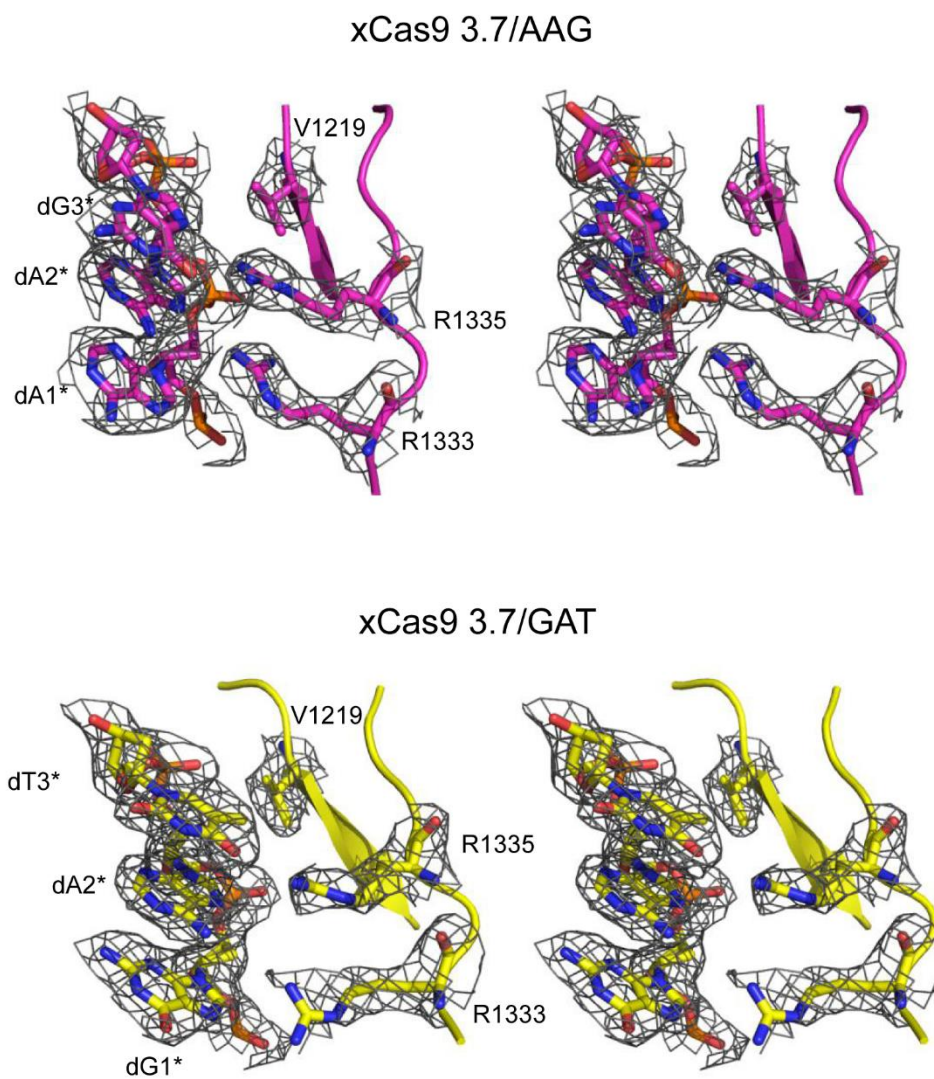

**Fig. S2 Electron density maps**

The  $2Fo - Fc$  omit electron density maps for R1333, R1335, V1219 and the PAM nucleotides in xCas9 3.7/GAT and xCas9 3.7/AAG are shown as a gray mesh (contoured at  $1.0 \sigma$ ).
