# Supplementary material for: Structural insights into a high fidelity variant of SpCas9
Source: PubMed Central journal article supplement (PMC6460432; doi:10.1038/s41422-018-0131-6), 2019-01-21
Supplement: 41422_2018_131_MOESM3_ESM.pdf [file 41422_2018_131_MOESM3_ESM.pdf]

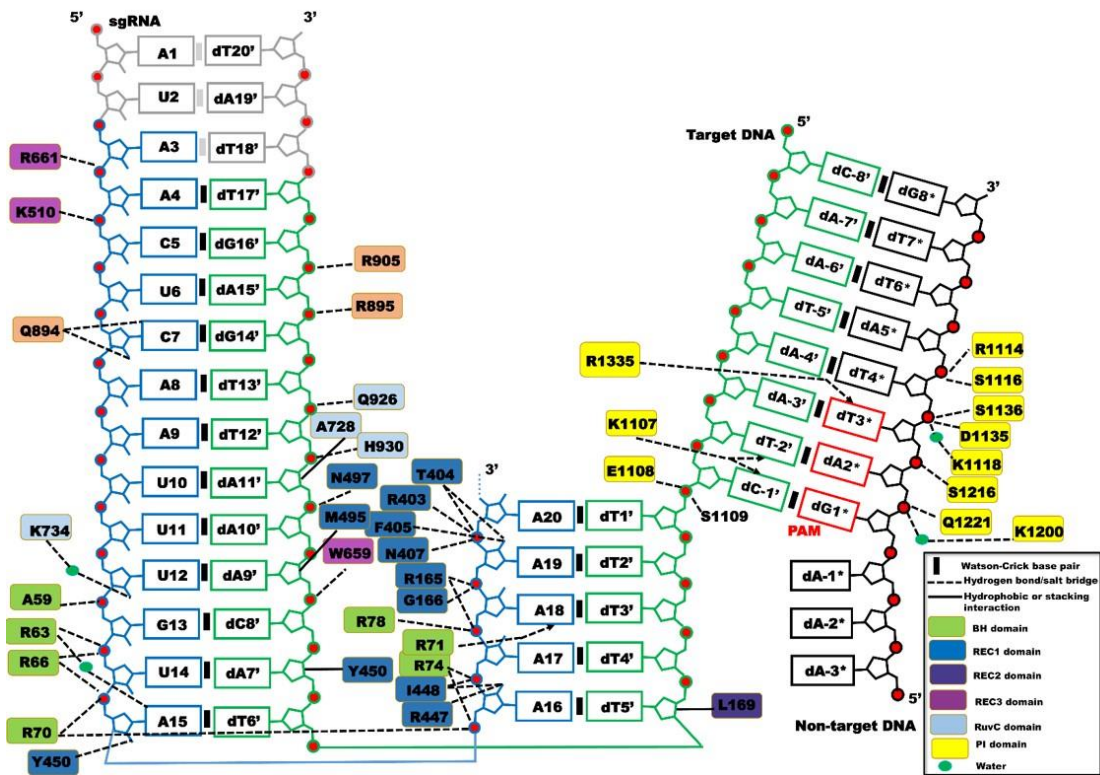

Fig. S3 Schematic representation of interactions of sgRNA/DNA heteroduplex with xCas9 3.7
