# Supplementary material for: Structural insights into a high fidelity variant of SpCas9
Source: PubMed Central journal article supplement (PMC6460432; doi:10.1038/s41422-018-0131-6), 2019-01-21
Supplement: 41422_2018_131_MOESM4_ESM.pdf [file 41422_2018_131_MOESM4_ESM.pdf]

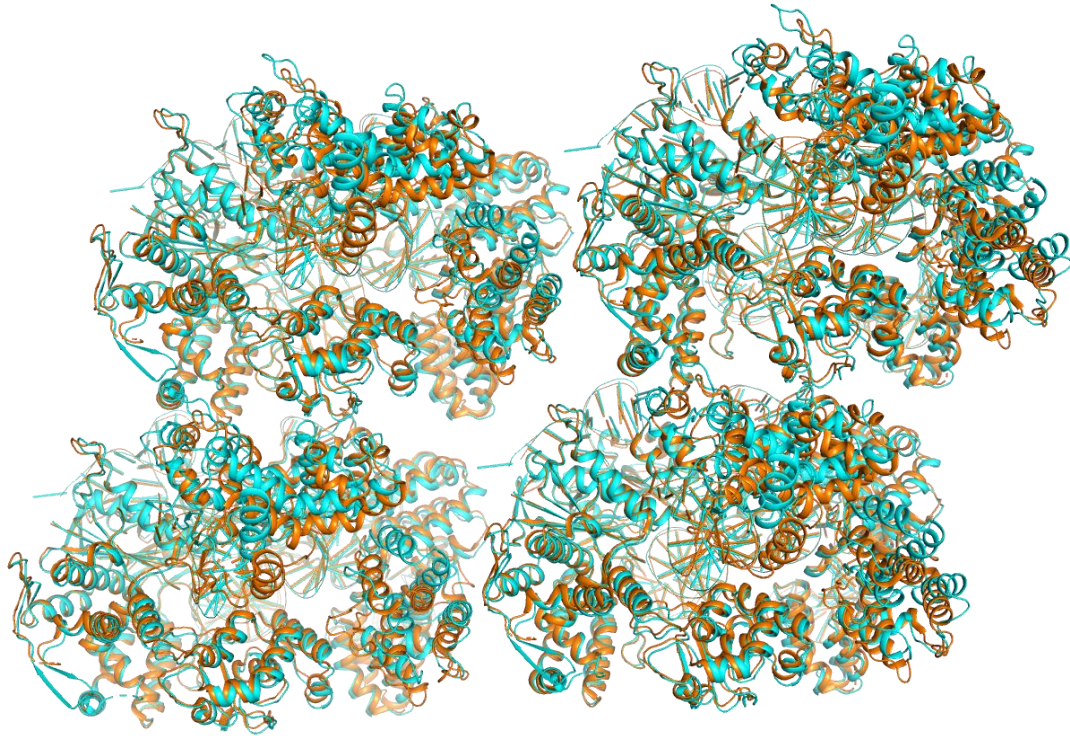

**Fig. S4 Crystal packing of SpCas9-sgRNA-DNA (PDB: 4UN3) (Orange) and xCas9 3.7 (Cyan)**
