# Supplementary material for: Structural insights into a high fidelity variant of SpCas9
Source: PubMed Central journal article supplement (PMC6460432; doi:10.1038/s41422-018-0131-6), 2019-01-21
Supplement: 41422_2018_131_MOESM6_ESM.pdf [file 41422_2018_131_MOESM6_ESM.pdf]

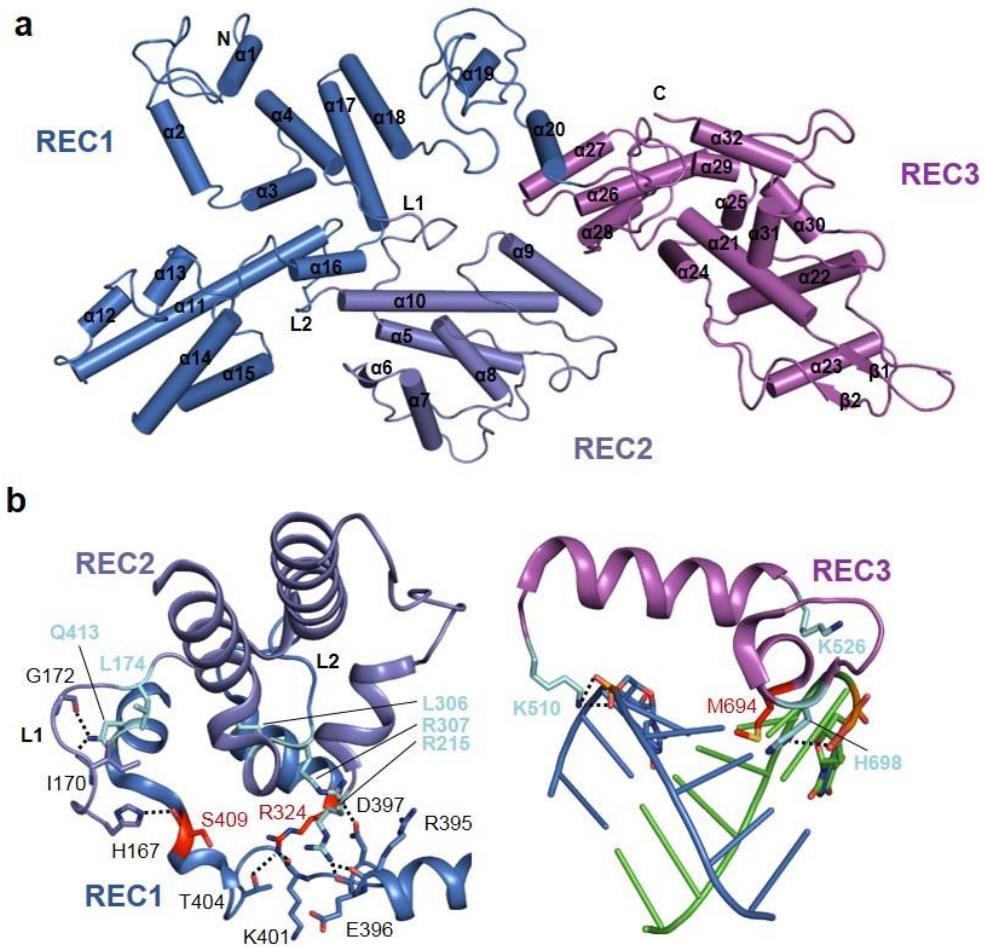

**Fig. S6 The interfaces of REC1-REC2 (HFH1) and REC3-RNA/DNA heteroduplex (HFH2) of SpCas9 (PDB: 4UN3)**

- a. The overall structure of REC1 (blue), REC2 (slate) and REC3 (purple) domains. The secondary structural elements in the structure are numbered.
- b. The interfaces of REC1-REC2 and REC3-RNA/DNA heteroduplex of SpCas9 (PDB: 4UN3) with the location of rationally designed mutations shown.
