# Supplementary material for: Structural insights into a high fidelity variant of SpCas9
Source: PubMed Central journal article supplement (PMC6460432; doi:10.1038/s41422-018-0131-6), 2019-01-21
Supplement: 41422_2018_131_MOESM7_ESM.pdf [file 41422_2018_131_MOESM7_ESM.pdf]

Supplementary information, Table S1 | **Data collection and refinement statistics**

|                                                                                       | xCas9 3.7/GAT         | xCas9 3.7/AAG         |
|---------------------------------------------------------------------------------------|-----------------------|-----------------------|
| Data collection                                                                       |                       |                       |
| Beam Line                                                                             | BL19U, SSRF           | BL19U, SSRF           |
| Space Group                                                                           | C2                    | C2                    |
| Unit Cell Parameters                                                                  |                       |                       |
| <i>a</i> , <i>b</i> , <i>c</i> (Å)                                                    | 190.48, 70.46, 183.53 | 361.85, 71.13, 198.32 |
| <i>α</i> , <i>β</i> , <i>γ</i> (°)                                                    | 90.00, 106.48, 90.00  | 90.00, 101.75, 90.00  |
| Wavelength(Å)                                                                         | 0.9789                | 0.9789                |
| Resolution limits(Å)                                                                  | 50.00-2.70(2.75-2.70) | 50.00-3.00(3.18-3.00) |
| No. of unique reflections                                                             | 60687(3085)           | 98977(15638)          |
| Completeness (%)                                                                      | 94.1(96.1)            | 99.3(98.0)            |
| Redundancy                                                                            | 2.8(2.6)              | 4.2(3.9)              |
| <i>R</i> <sub>merge</sub> (%) <sup>a</sup>                                            | 8.2(45.0)             | 11.9(97.3)            |
| Mean I/σ(I)                                                                           | 9.1(1.8)              | 10.1(1.6)             |
| Refinement                                                                            |                       |                       |
| Resolution limits(Å)                                                                  | 45.00-2.70            | 50.00-3.00            |
| No. reflections                                                                       | 56285                 | 98522                 |
| <i>R</i> <sub>work</sub> (%) <sup>b</sup> / <i>R</i> <sub>free</sub> (%) <sup>c</sup> | 21.47/26.25           | 23.10/28.28           |
| R.m.s.d for bonds (Å)                                                                 | 0.005                 | 0.004                 |
| R.m.s.d for angles (°)                                                                | 0.762                 | 0.698                 |
| Averaged B factor of the structure                                                    | 37.1                  | 73.3                  |
| No. of non-hydrogen protein atoms                                                     | 13426                 | 26372                 |
| Ramachandran plot (%)                                                                 |                       |                       |
| Preferred region                                                                      | 93.45                 | 90.28                 |
| Allowed region                                                                        | 6.55                  | 9.72                  |
| Outliers                                                                              | 0.00                  | 0.00                  |

Highest-resolution shell is shown in parenthesis.

<sup>a</sup>  $R_{merge} = \sum |I_i - \langle I \rangle| / \sum I_i$ , where  $I_i$  is the intensity of an individual reflection and  $\langle I \rangle$  is the average intensity of that reflection.

<sup>b</sup>  $R_{work} = \sum ||F_o| - |F_c|| / \sum |F_o|$ , where  $F_o$  and  $F_c$  are the observed and calculated structure factors for reflections, respectively.

<sup>c</sup>  $R_{free}$  was calculated as  $R_{work}$  using the 5% of reflections that were selected randomly and omitted from refinement.
