# Supplementary material for: Structural insights into a high fidelity variant of SpCas9
Source: PubMed Central journal article supplement (PMC6460432; doi:10.1038/s41422-018-0131-6), 2019-01-21
Supplement: 41422_2018_131_MOESM8_ESM.pdf [file 41422_2018_131_MOESM8_ESM.pdf]

Supplementary Table 2 | **Nucleic acid sequences used in the study**

| <b>RNA sequence</b>                         | <b>Sequence (5' to 3')</b>                                                                                                               |
|---------------------------------------------|------------------------------------------------------------------------------------------------------------------------------------------|
| SpCas9_sgRNA                                | GGAUAAACUCAAUUUGUAAAAAAGUUUU<br>AGAGCUAGAAAUAGCAAGUAAAAUAA<br>GGCUAGUCCGUUAUCAACUUGAAAAAG<br>UGGCACCGAGUCGGUGCUU                         |
| <b>dsDNA substrate sequence</b>             |                                                                                                                                          |
| TarDNA_AAG-PAM                              | CAATACTTTTTTTTACAAATTGAGTTAT                                                                                                             |
| Non-tarDNA_AAG-PAM                          | AAAAGTATTG                                                                                                                               |
| TarDNA_GAT-PAM                              | CAATAATCTTTTTTTACAAATTGAGTTAT                                                                                                            |
| Non-tarDNA_GAT-PAM                          | AAAGATTATTG                                                                                                                              |
| <b>RNA transcription assay DNA template</b> |                                                                                                                                          |
| SpCas9_sgRNA_DNA template                   | ATGTAATACGACTCACTATAGGATAACT<br>CAATTTGTAAAAAAGTTTTAGAGCTAGA<br>AATAGCAAGTTAAAATAAGGCTAGTCCG<br>TTATCAACTTGAAAAAGTGGCACCGAGT<br>CGGTGCTT |
| <b>In vitro DNA cleavage assay primer</b>   |                                                                                                                                          |
| TGG_BamH1_5                                 | GATCCCAATTCCATTTTTTTACAAATTGAG<br>TTATG                                                                                                  |
| TGG_EcoR1_3                                 | AATTCATAACTCAATTTGTAAAAAATGG<br>AATTGG                                                                                                   |
| AGA_BamH1_5                                 | GATCCCAATTCTTTTTTTACAAATTGAG<br>TTATG                                                                                                    |
| AGA_EcoR1_3                                 | AATTCATAACTCAATTTGTAAAAAAGA<br>AATTGG                                                                                                    |
| GAT_BamH1_5                                 | GATCCCAATTATCTTTTTTTACAAATTGAG<br>TTATG                                                                                                  |
| GAT_EcoR1_3                                 | AATTCATAACTCAATTTGTAAAAAAGAT<br>AATTGG                                                                                                   |
| TGT_BamH1_5                                 | GATCCCAATTACATTTTTTTACAAATTGAG<br>TTATG                                                                                                  |
| TGT_EcoR1_3                                 | AATTCATAACTCAATTTGTAAAAAATGT<br>AATTGG                                                                                                   |
| TGG_13/14_BamH1_5                           | GATCCCAATTCCATTTTTTTACAAATCAAG<br>TTATG                                                                                                  |
| TGG_13/14_EcoR1_3                           | AATTCATAACTTGATTTGTAAAAAATGG<br>AATTGG                                                                                                   |
| TGG_15/16_BamH1_5                           | GATCCCAATTCCATTTTTTTACAAATTGGA<br>TTATG                                                                                                  |
| TGG_15/16_EcoR1_3                           | AATTCATAATCCAATTTGTAAAAAATGG<br>AATTGG                                                                                                   |

|                                                    |                                                                                                                                                                                                                                                                                                                                                                       |
|----------------------------------------------------|-----------------------------------------------------------------------------------------------------------------------------------------------------------------------------------------------------------------------------------------------------------------------------------------------------------------------------------------------------------------------|
| TGG_17/18_BamH1_5                                  | GATCCCAATTCCATTTTTTACAAATTGAG<br>CCATG                                                                                                                                                                                                                                                                                                                                |
| TGG_17/18_EcoR1_3                                  | AATTCATGGCTCAATTGTAAAAAATGG<br>AATTGG                                                                                                                                                                                                                                                                                                                                 |
| TGG_18/19_BamH1_5                                  | GATCCCAATTCCATTTTTTACAAATTGAG<br>TCGTG                                                                                                                                                                                                                                                                                                                                |
| TGG_18/19_EcoR1_3                                  | AATTCACGACTCAATTGTAAAAAATGG<br>AATTGG                                                                                                                                                                                                                                                                                                                                 |
| TGT_13/14_BamH1_5                                  | GATCCCAATTACATTTTTTACAAATCAA<br>GTTATG                                                                                                                                                                                                                                                                                                                                |
| TGT_13/14_EcoR1_3                                  | AATTCATAACTTGATTGTAAAAAATGT<br>AATTGG                                                                                                                                                                                                                                                                                                                                 |
| TGT_15/16_BamH1_5                                  | GATCCCAATTACATTTTTTACAAATTGGA<br>TTATG                                                                                                                                                                                                                                                                                                                                |
| TGT_15/16_EcoR1_3                                  | AATTCATAATCCAATTGTAAAAAATGT<br>AATTGG                                                                                                                                                                                                                                                                                                                                 |
| TGT_17/18_BamH1_5                                  | GATCCCAATTACATTTTTTACAAATTGAG<br>CCATG                                                                                                                                                                                                                                                                                                                                |
| TGT_17/18_EcoR1_3                                  | AATTCATGGCTCAATTGTAAAAAATGT<br>AATTGG                                                                                                                                                                                                                                                                                                                                 |
| TGT_18/19_BamH1_5                                  | GATCCCAATTACATTTTTTACAAATTGAG<br>TCGTG                                                                                                                                                                                                                                                                                                                                |
| TGT_18/19_EcoR1_3                                  | AATTCACGACTCAATTGTAAAAAATGT<br>AATTGG                                                                                                                                                                                                                                                                                                                                 |
| pUC18_5                                            | CATTCAGGCTGCGCAACTGTTGG                                                                                                                                                                                                                                                                                                                                               |
| pUC18_3                                            | CCAGGCTTTACACTTTATGCT                                                                                                                                                                                                                                                                                                                                                 |
| <b><i>In vitro</i> cleavage assay DNA sequence</b> |                                                                                                                                                                                                                                                                                                                                                                       |
| pUC18_substrate                                    | CATTCAGGCTGCGCAACTGTTGGGAAGG<br>GCGATCGGTGCGGGCCTCTTCGCTATTA<br>CGCCAGCTGGCGAAAGGGGGATGTGCTG<br>CAAGGCGATTAAGTTGGGTAACGCCAGG<br>GTTTTCCAGTCACGACGTTGTAAAACG<br>ACGGCCAGTGCCAAGCTTGCATGCCTGC<br>AGGTGCACTCTAGAGGATCCCAATTCCA<br>TTTTTTACAAATTGAGTTATGAATTCGTA<br>ATCATGGTCATAGCTGTTTCCTGTGTGAA<br>ATTGTTATCCGCTCACAATCCACACAA<br>CATACGAGCCGGAAGCATAAAGTGTA<br>AGCCTGG |
| <b><i>EMX1</i> target site Sequence</b>            | GTCACCTCCAATGACTAGGGTGG                                                                                                                                                                                                                                                                                                                                               |
| <b><i>EMX1</i> target site mismatched primer</b>   |                                                                                                                                                                                                                                                                                                                                                                       |
| TGG_15/16_5                                        | caccGTCAGGTCCAATGACTAGGG                                                                                                                                                                                                                                                                                                                                              |

|                                            |                           |
|--------------------------------------------|---------------------------|
| TGG_15/16_3                                | aaacCCCTAGTCATTGGACCTGAC  |
| TGG_17/18_5                                | caccGTGTCTCCAATGACTAGGG   |
| TGG_17/18_3                                | aaacCCCTAGTCATTGGAGGACAC  |
| TGG_18/19_5                                | caccGAGACCTCCAATGACTAGGG  |
| TGG_18/19_3                                | aaacCCCTAGTCATTGGAGGTCTC  |
| TGG_wt_5                                   | caccGTCACCTCCAATGACTAGGG  |
| TGG_wt_3                                   | aaacCCCTAGTCATTGGAGGTGAC  |
| <b>VEGFA target site Sequence</b>          | GGGAAGCTGGGTGAATGGAGCGA   |
| <b>VEGFA target site mismatched primer</b> |                           |
| CGA_15/16_5                                | caccGGGATCCTGGGTGAATGGAG  |
| CGA_15/16_3                                | aaacCTCCATTCACCCAGGATCCC  |
| CGA_17/18_5                                | caccGGCTAGCTGGGTGAATGGAG  |
| CGA_17/18_3                                | aaacCTCCATTCACCCAGCTAGCC  |
| CGA_18/19_5                                | caccGCCAAGCTGGGTGAATGGAG  |
| CGA_18/19_3                                | aaacCTCCATTCACCCAGCTTGGC  |
| CGA_wt_5                                   | caccGGGAAGCTGGGTGAATGGAG  |
| CGA_wt_3                                   | aaacCTCCATTCACCCAGCTTCCC  |
| <b>FANCF target site Sequence</b>          | GCGGTCTCAAGCACTACCTACGT   |
| <b>FANCF target site mismatched primer</b> |                           |
| CGT_15/16_5                                | caccGCGGAGTCAAGCACTACCTA  |
| CGT_15/16_3                                | aaacTAGGTAGTGCTTGACTCCGC  |
| CGT_17/18_5                                | caccGCCCTCTCAAGCACTACCTA  |
| CGT_17/18_3                                | aaacTAGGTAGTGCTTGAAGAGGGC |
| CGT_18/19_5                                | caccGGCGTCTCAAGCACTACCTA  |
| CGT_18/19_3                                | aaacTAGGTAGTGCTTGAAGACGCC |
| CGT_wt_5                                   | caccGCGGTCTCAAGCACTACCTA  |
| CGT_wt_3                                   | aaacTAGGTAGTGCTTGAAGACCGC |
| <b>T7 endonuclease I assay primer</b>      |                           |
| <i>EMXI</i> test F                         | CCATCCCCTTCTGTGAATGT      |
| <i>EMXI</i> test R                         | GGAGATTGGAGACACGGAGA      |
| <i>VEGFA</i> test F                        | CCCCTTTCCAAAGCCCATTCC     |
| <i>VEGFA</i> test R                        | TCTGCGGACGCTCAGTGAAG      |
| <i>FANCF</i> test F                        | GTTGCCAGAGTCAAGGAAC       |
| <i>FANCF</i> test R                        | CAGGTGGTAACGAGCTGCATC     |

| <b>T7 endonuclease I assay DNA sequence</b> |                                                                                                                                                                                                                                                                                                                                                                                                                                                                                                                                                                                                                                                                                                                                                    |
|---------------------------------------------|----------------------------------------------------------------------------------------------------------------------------------------------------------------------------------------------------------------------------------------------------------------------------------------------------------------------------------------------------------------------------------------------------------------------------------------------------------------------------------------------------------------------------------------------------------------------------------------------------------------------------------------------------------------------------------------------------------------------------------------------------|
| <i>EMXI</i> target site flanking sequence   | GGAGATTGGAGACACGGAGAGCAGCTG<br>GGAGGCTGCGGTGGCGGGCGGGCCCCGC<br>CCAGGCAGGCAGGCTCTCCGAGGAGAA<br>GGCCAAGTGGTCCCAGGCCTCAGCCAGC<br>CCATTGCTTGTCCTCTGTCAATGGCGGC<br>CCCGGGCTTCAAGCCCTGTGGGGCCATG<br>ACTCCAGGCCTCCCCAAAGCCTGGCCAG<br>GGAGTGGCCAGAGTCCAGCTTGGGCCCA<br>CGCAGGGGCCTGGCCAGCAGCAAGCAG<br>CACTCTGCCCTCGTGGGTTTGTGGTTGCC<br>CACCTAGTCATTGGAGGTGACATCGAT<br>GTCCTCCCCATTGGCCTGCTTCGTGGCAA<br>TGCGCCACCGGTTGATGTGATGGGAGCC<br>CTTCTTCTTCTGCTCGGACTCAGGCCCTT<br>CCTCCTCCAGCTTCTGCCGTTTGTACTTT<br>GTCCTCCGGTTCTGGAACCACACCTTCA<br>CCTGGGCCAGGGAGGGAGGGGCACAGA<br>TGAGAAACTCAGGAGGCCCCAGAGCA<br>GCCACTGGGGCCTCAACTCAGGCTGA<br>GCTGAGAGCCTGATGGGAAGACTGAGG<br>CTACATAGGGTTAGGGGCCCCAGGCCGG<br>GGTCCCCTCTGACCAGCTGCTCCCATGG<br>GTCTAACATTACAGAAGGGGATGG |
| <i>VEGFA</i> target site flanking sequence  | CCCCTTTCCAAAGCCCATTCCCTCTTTAG<br>CCAGAGCCGGGGTGTGCAGACGGCAGTC<br>ACTAGGGGGCGCTCGGCCACCACAGGG<br>AAGCTGGGTGAATGGAGCGAGCAGCGT<br>CTTCGAGAGTGAGGACGTGTGTGTCTGT<br>GTGGGTGAGTGAGTGTGTGCGTGTGGGG<br>TTGAGGGCGTTGGAGCGGGGAGAAGGC<br>CAGGGGTCACTCCAGGATTCCAATAGAT<br>CTGTGTGTCCCTCTCCCCACCCGTCCCTG<br>TCCGGCTCTCCGCCTTCCCCTGCCCCCTT<br>CAATATTCCTAGCAAAGAGGGAACGGCT<br>CTCAGGCCCTGTCCGCACGTAACCTCAC<br>TTTCCTGCTCCCTCCTCGCCAATGCCCCG<br>CGGGCGCGTGTCTCTGGACAGAGTTTCC<br>GGGGCGGATGGGTAATTTTCAGGCTGT<br>GAACCTTGGTGGGGGTGAGCTTCCCCT<br>TCATTGCGGCGGGCTGCGGGCCAGGCTT<br>CACTGAGCGTCCGCAGA                                                                                                                                                                   |
| <i>FANCF</i> target site flanking sequence  | GTTGCCAGAGTCAAGGAACACGGATAA<br>AGACGCTGGGAGATTGACATGCATTTCC                                                                                                                                                                                                                                                                                                                                                                                                                                                                                                                                                                                                                                                                                        |

|  |                                                                                                                                                                                                                                                                                                                                                                                                                                                                                                                   |
|--|-------------------------------------------------------------------------------------------------------------------------------------------------------------------------------------------------------------------------------------------------------------------------------------------------------------------------------------------------------------------------------------------------------------------------------------------------------------------------------------------------------------------|
|  | ACCAATAGCATTGCAGAGAGGGGTATCA<br>TTTCGCGGATGTTCCAATCAGTACGCAG<br>AGAGTCGCCGTCTCCAAGGTGAAAGCGG<br>AAGTAGGGCCTTCGCGCACCTCATGGAA<br>TCCCTTCTGCAGCACCTGGATCGCTTTTC<br>CGAGCTTCTGGCGGTCTCAAGCACTACC<br>TACGTCAGCACCTGGGACCCCGCCACCG<br>TGCGCCGGGCCTTGCAGTGGGCGCGCTA<br>CCTGCGCCACATCCATCGGCGCTTTGGT<br>CGGCATGGCCCCATTCGCACGGCTCTGG<br>AGCGGCGGCTGCACAACCAGTGGAGGC<br>AAGAGGGCGGCTTTGGGCGGGGTCCAGT<br>TCCGGGATTAGCGAACTTCCAGGCCCTC<br>GGTCACTGTGACGTCCTGCTCTCTGCG<br>CCTGCTGGAGAACCGGGCCCTCGGGGAT<br>GCAGCTCGTTACCACCTG |
|--|-------------------------------------------------------------------------------------------------------------------------------------------------------------------------------------------------------------------------------------------------------------------------------------------------------------------------------------------------------------------------------------------------------------------------------------------------------------------------------------------------------------------|
